# Supplementary material for: Stress Responsive Proteins Are Actively Regulated during Rice (Oryza sativa) Embryogenesis as Indicated by Quantitative Proteomics Analysis
Source: PubMed Central journal article supplement (PMC3776822; doi:10.1371/journal.pone.0074229), 2013-09-18
Supplement: pone.0074229.s005.pdf [file pone.0074229.s005.pdf]

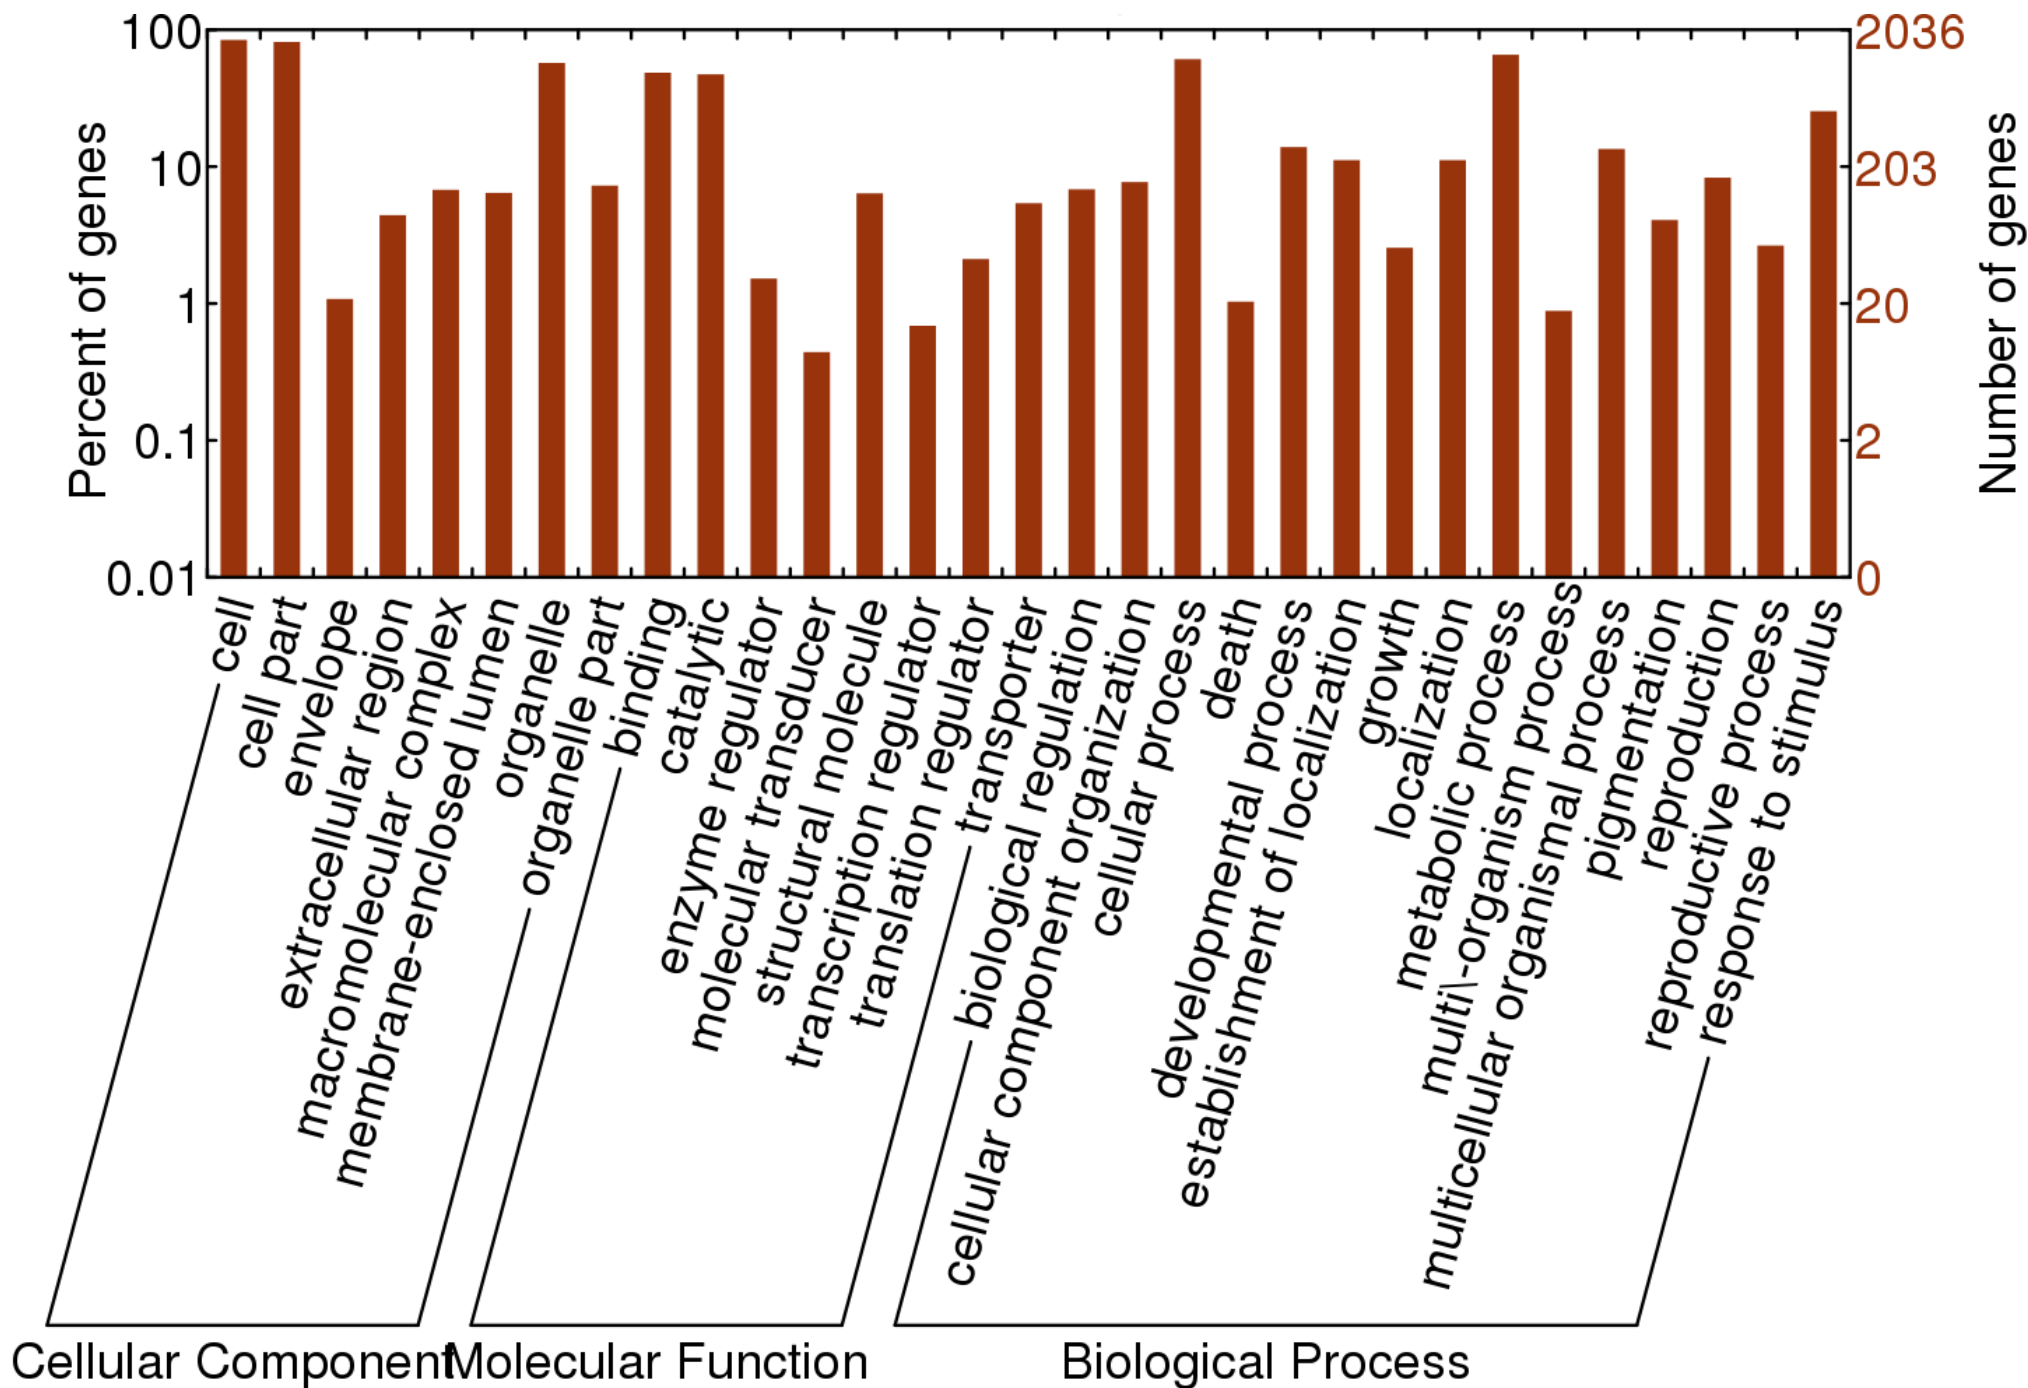

**Figure S1 GO classification of identified proteins**

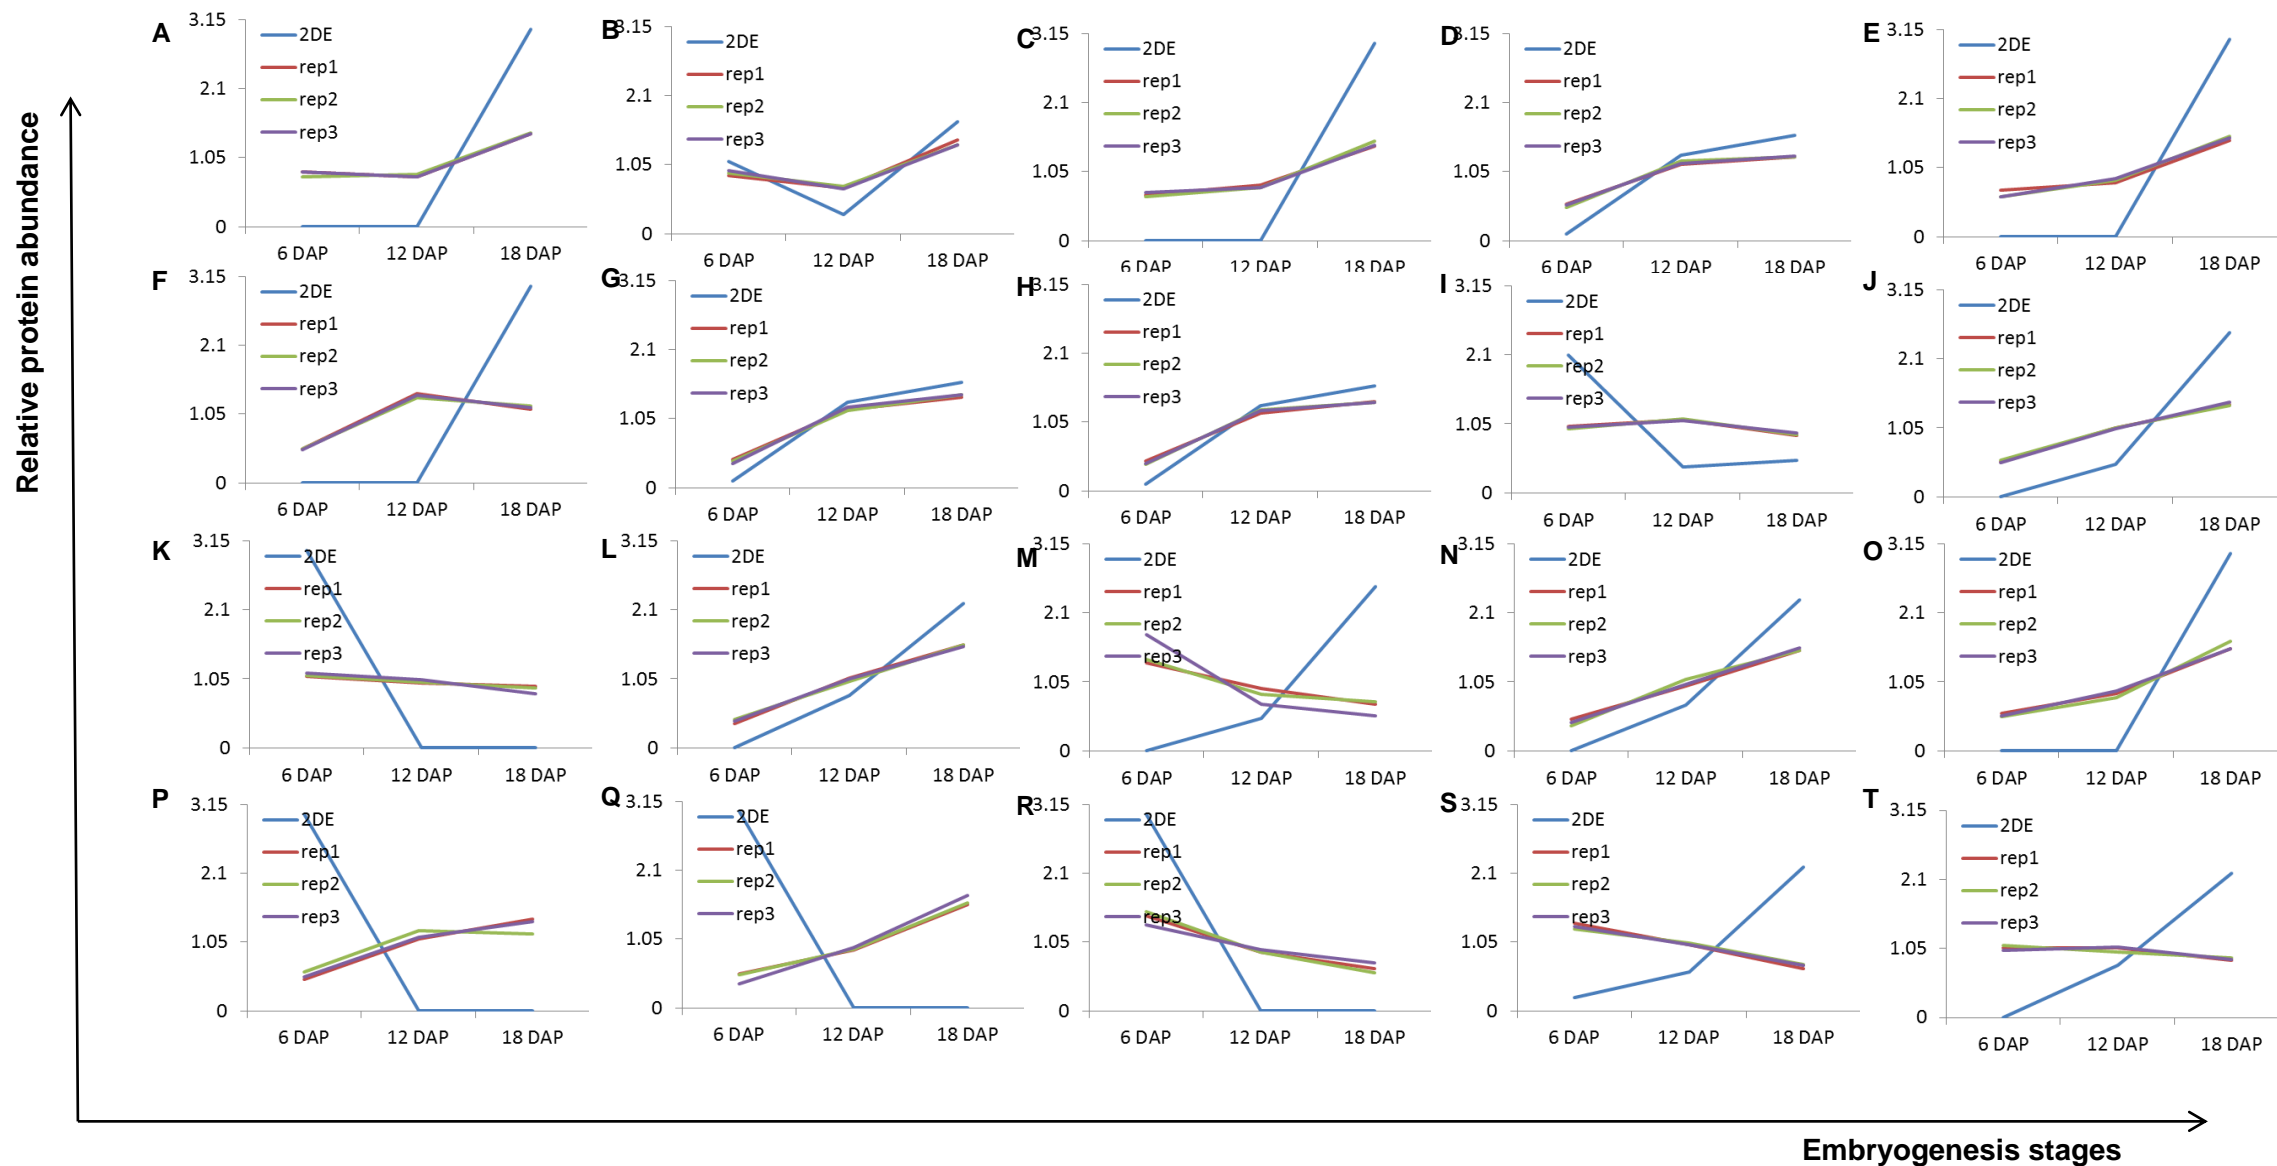

**Figure S2** Protein abundances profiles quantified by 2DE and three replicated iTRAQ

From A to T represent the profiles of protein with locus number: LOC\_Os03g31360, LOC\_Os02g16820, LOC\_Os01g55690, LOC\_Os03g21790, LOC\_Os10g26060, LOC\_Os08g03410, LOC\_Os03g57960, LOC\_Os03g46100, LOC\_Os07g47510, LOC\_Os07g44430, LOC\_Os02g42320, LOC\_Os05g04870, LOC\_Os07g49400, LOC\_Os05g46480, LOC\_Os01g50910, LOC\_Os12g43140, LOC\_Os03g06360, LOC\_Os08g02120, LOC\_Os05g33380, LOC\_Os01g67860,.

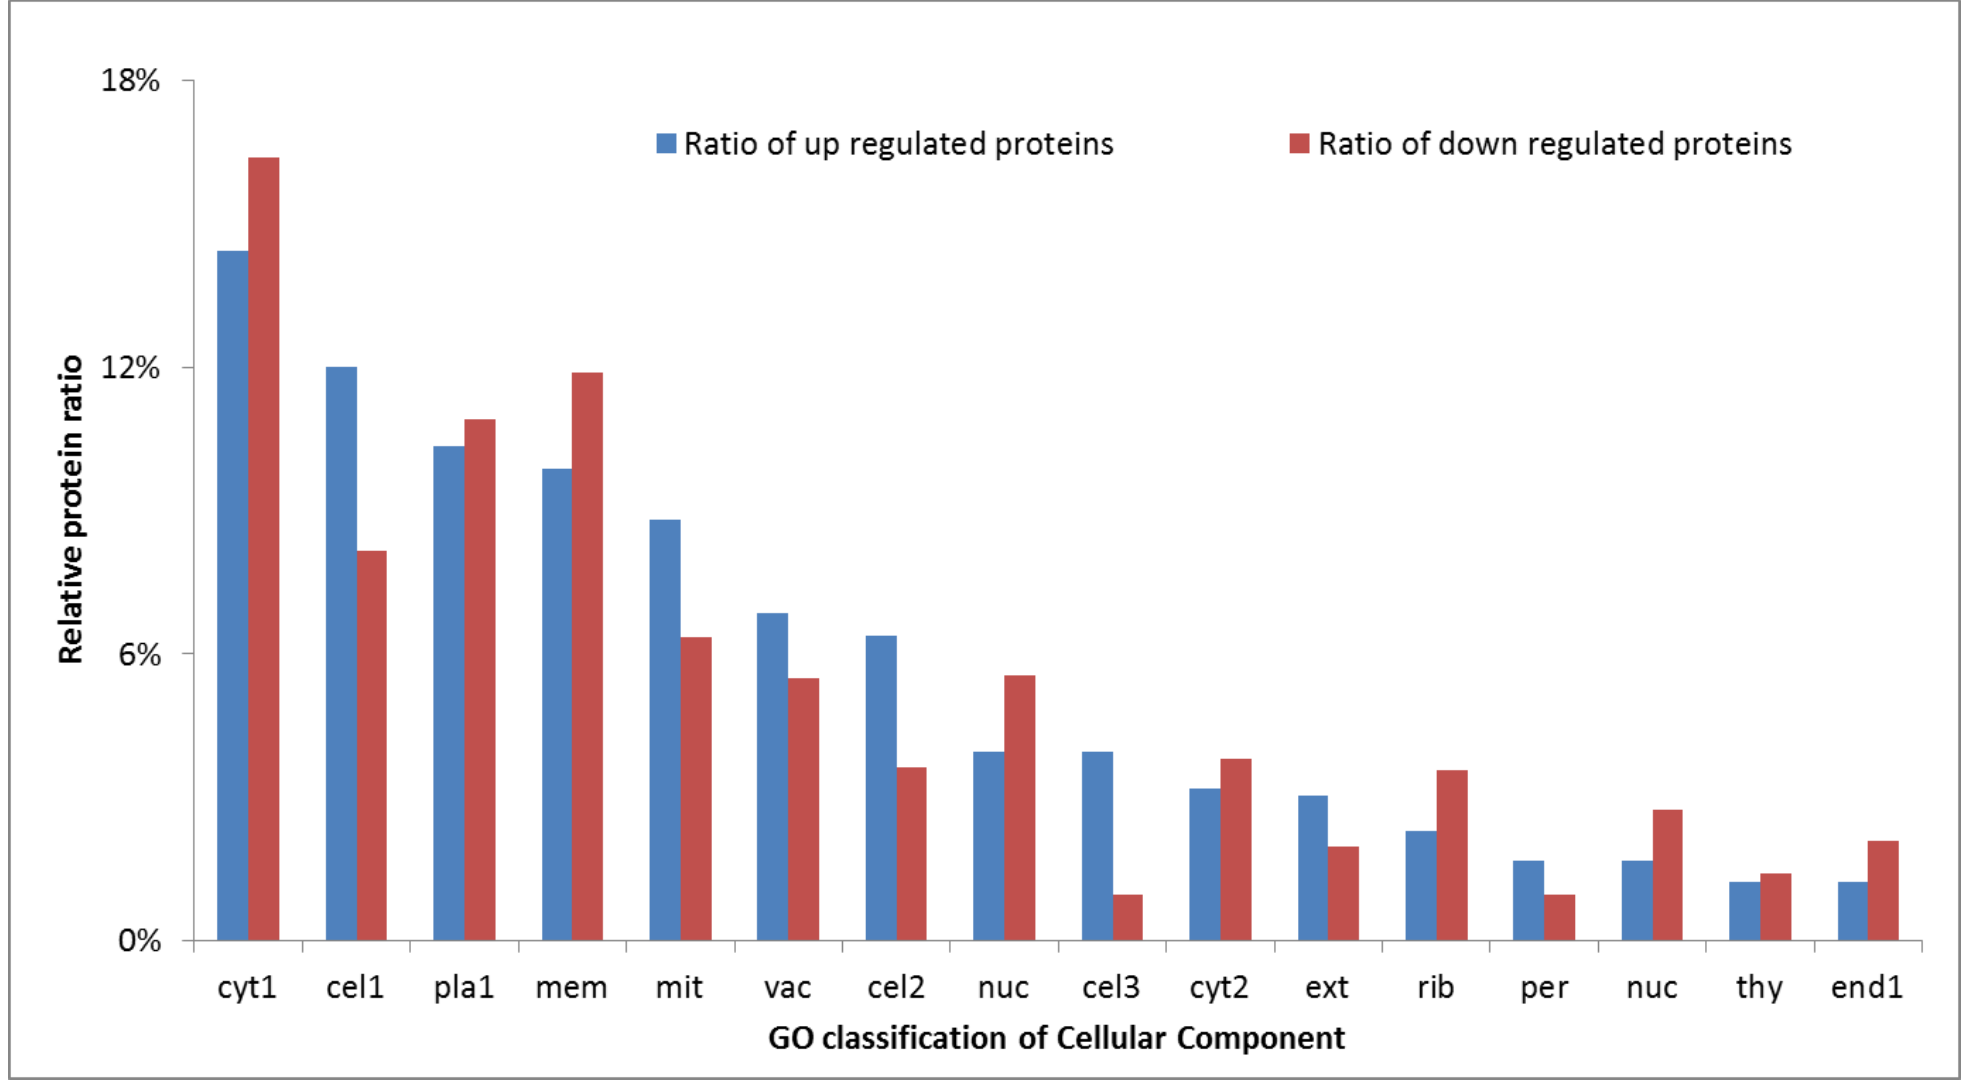

**Figure S3** Relative protein ratio in different Cellular Component GO classifications

cyt1 indicate cytosol; cel1 indicate cellular\_component; pla1 indicate plastid; mem indicate membrane; mit indicate mitochondrion; vac indicate vacuole; cel2 indicate cell wall; nuc indicate nucleus; cel3 indicate cell; cyt2 indicate cytoplasm; ext indicate extracellular region; rib indicate ribosome; pla2 indicate plasma membrane; per indicate peroxisome; nuc indicate nucleolus; thy indicate thylakoid; end1 indicate endoplasmic reticulum; int indicate intracellular; Gol indicate Golgi apparatus; nuc indicate nucleoplasm; end2 indicate endosome; nuc indicate nuclear envelope.

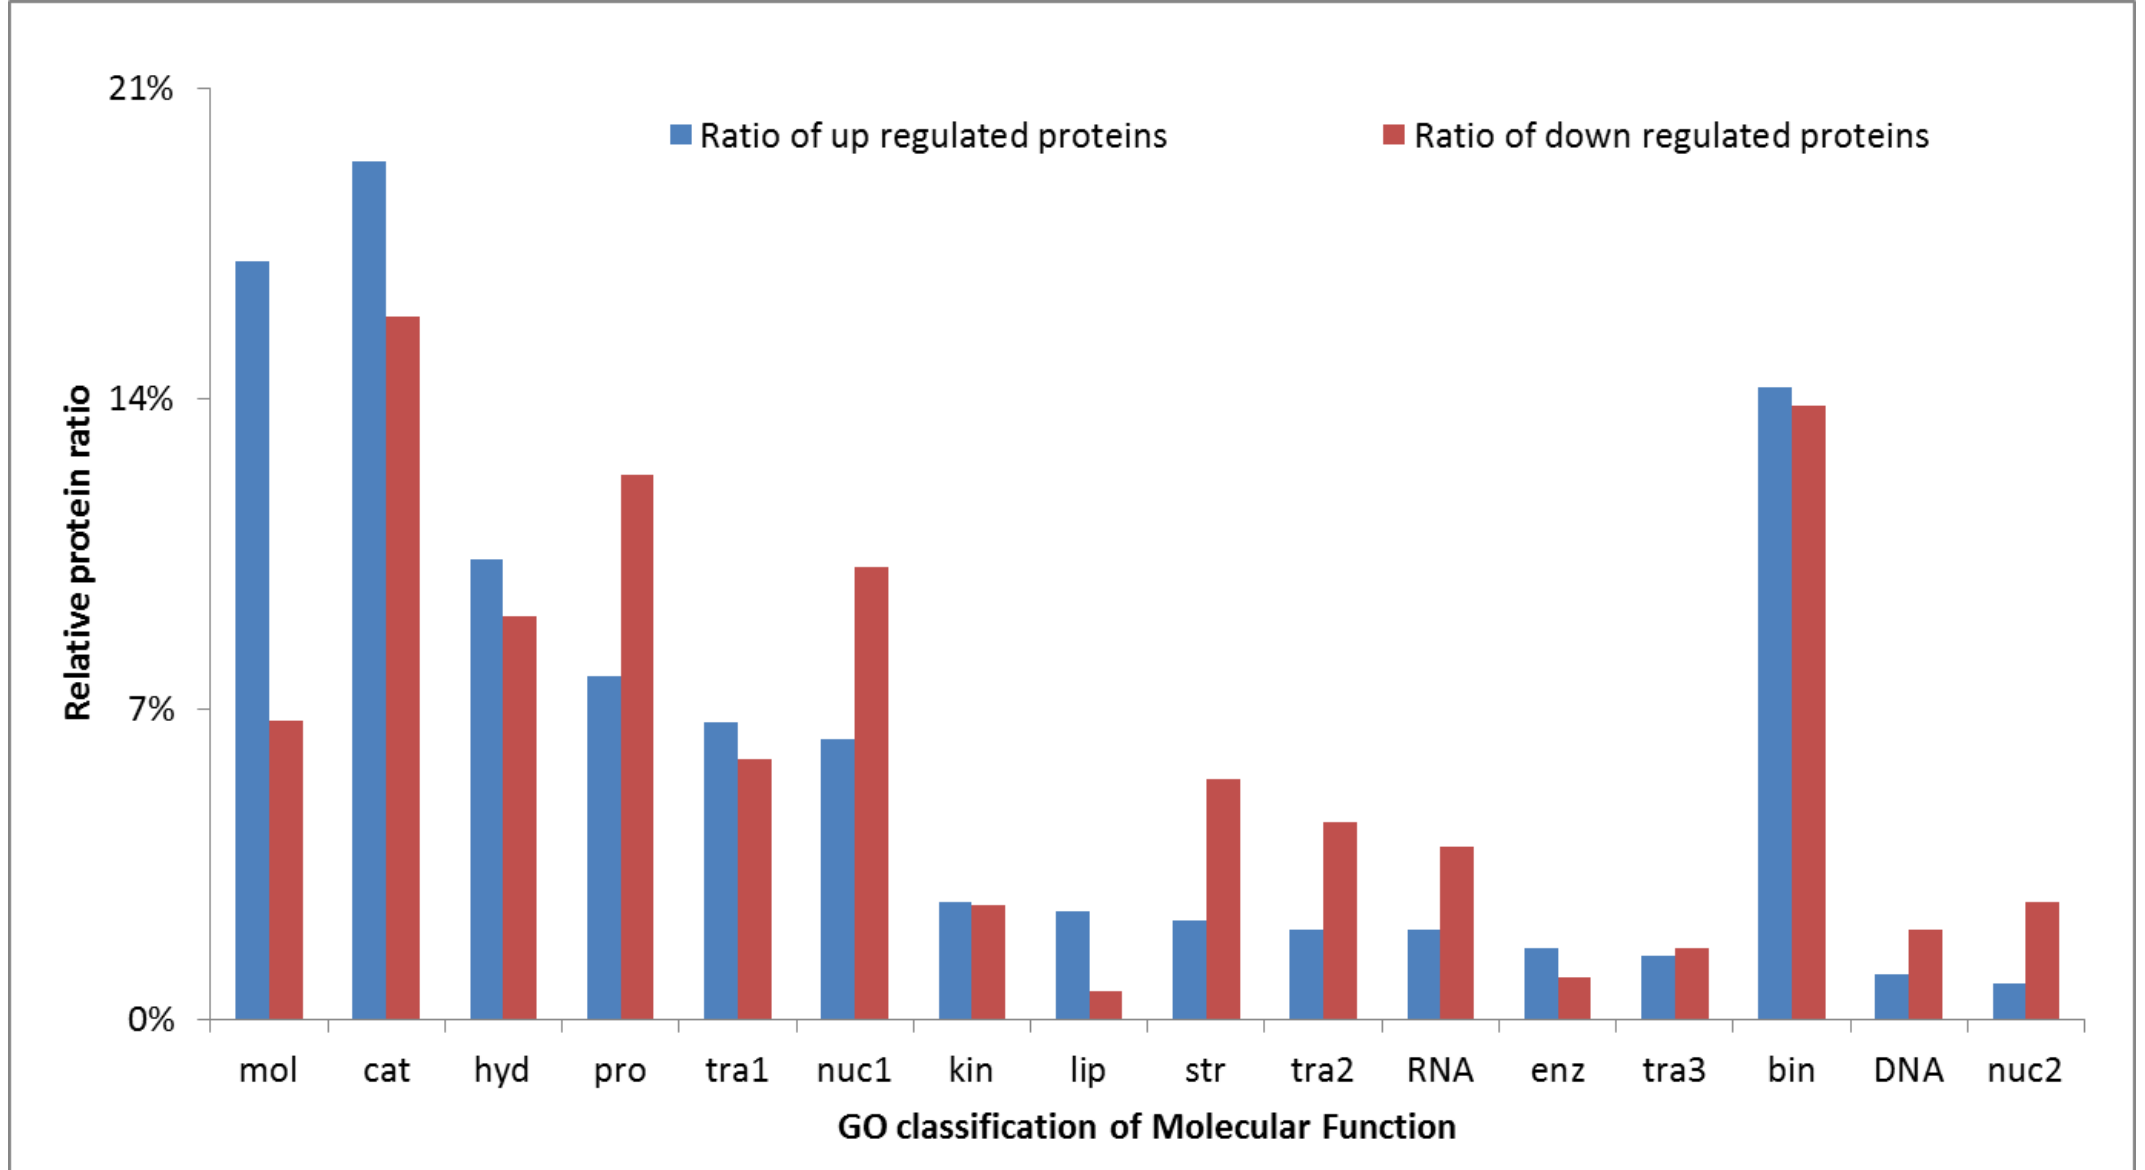

**Figure S4** Relative protein ratio in different Molecular Function GO classifications

mol indicate molecular\_function; cat indicate catalytic activity; hyd indicate hydrolase activity; pro indicate protein binding; tra1 indicate transferase activity; nuc1 indicate nucleotide binding; kin indicate kinase activity; lip indicate lipid binding; str indicate structural molecule activity; tra2 indicate transporter activity; RNA indicate RNA binding; enz indicate enzyme regulator activity; tra3 indicate translation factor activity, nucleic acid binding; bin indicate binding; DNA indicate DNA binding; nuc2 indicate nucleic acid binding.

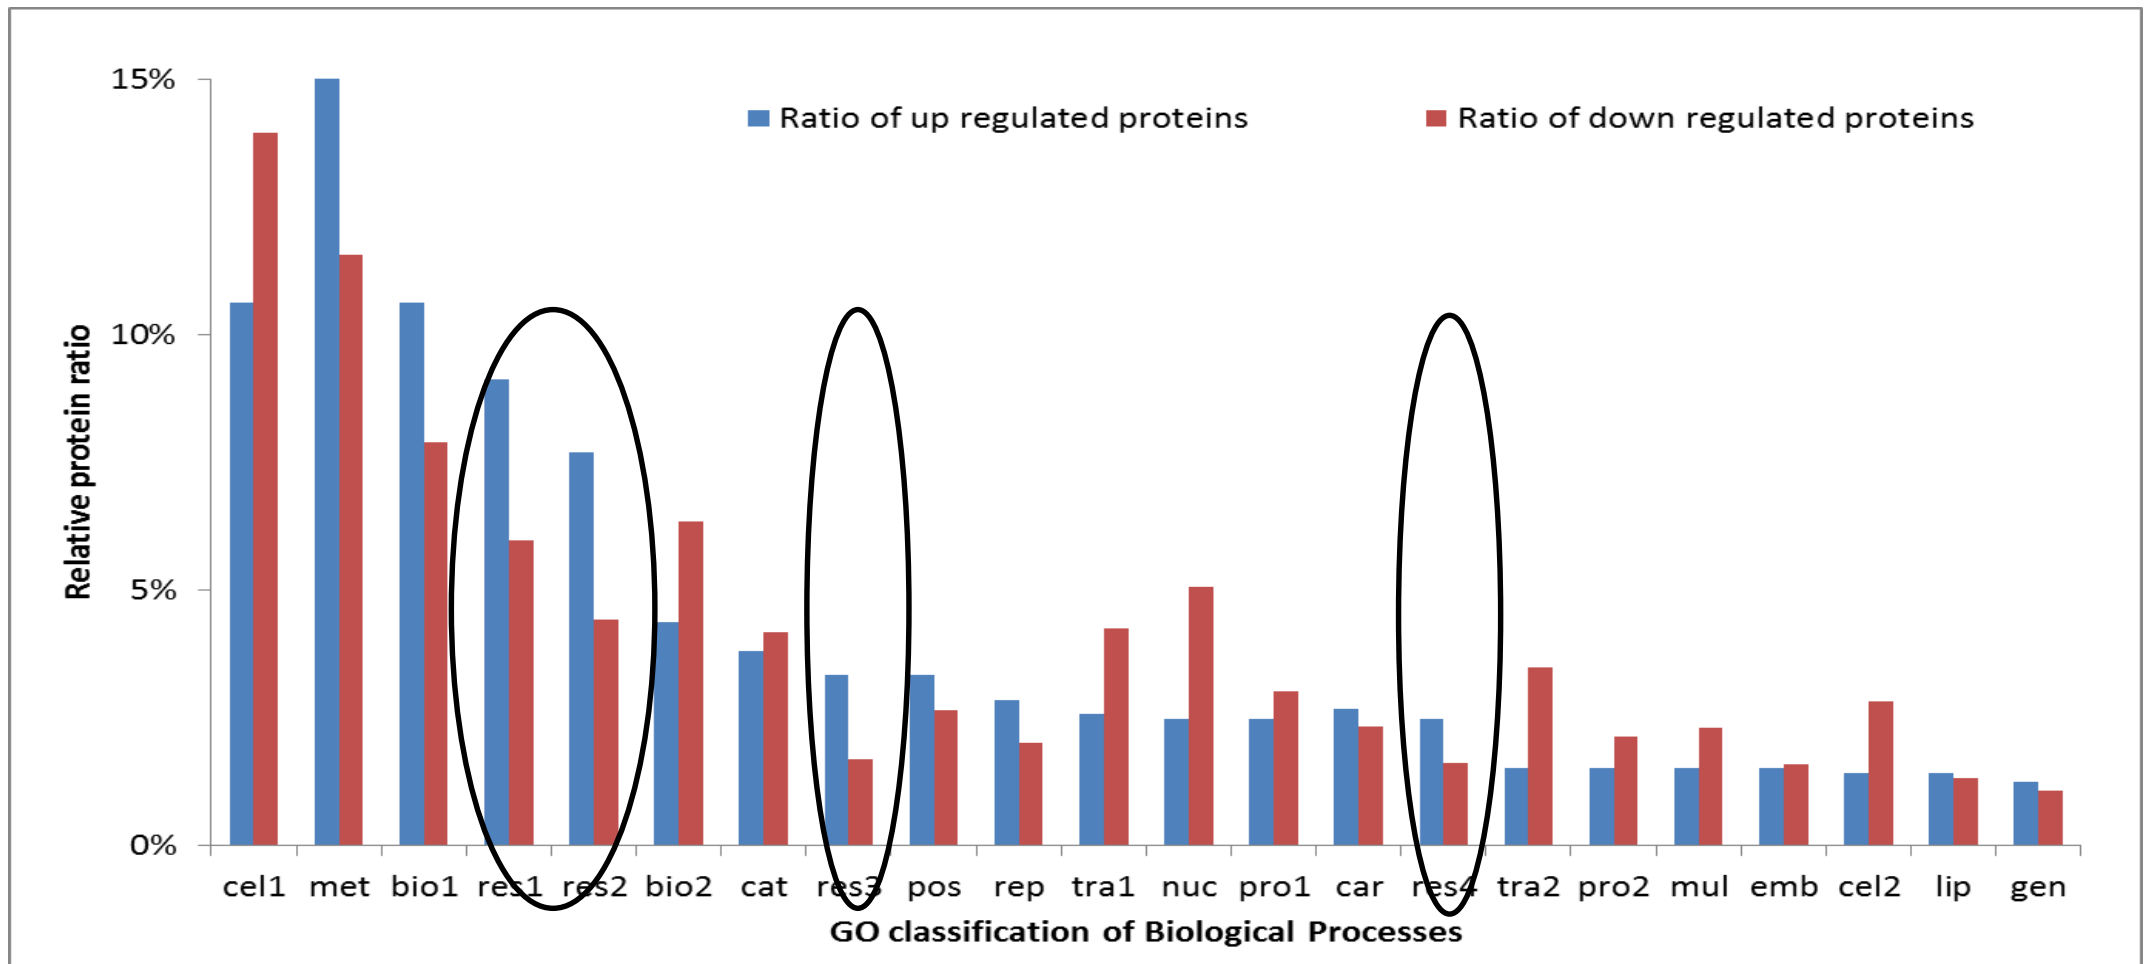

**Figure S5** Relative protein ratio in different biological function GO classifications

Three eclipses indicate the GO classification of response to kinds of stimulus.

cel1 indicate cellular process; met indicate metabolic process; bio1 indicate biological\_process; res1 indicate response to stress; res2 indicate response to abiotic stimulus; bio2 indicate biosynthetic process; cat indicate catabolic process; res3 indicate response to endogenous stimulus; pos indicate post-embryonic development; rep indicate reproduction; tra1 indicate transport; nuc indicate nucleobase, nucleoside, nucleotide and nucleic acid metabolic process; pro1 indicate protein metabolic process; car indicate carbohydrate metabolic process; res4 indicate response to biotic stimulus; tra2 indicate translation; pro2 indicate protein modification process; mul indicate multicellular organismal development; emb indicate embryo development; cel2 indicate cellular component organization; lip indicate lipid metabolic process; gen indicate generation of precursor metabolites and energy.
